# Supplementary material for: Cellular barriers in apple tissue regulate polyphenol release under different food processing and in vitro digestion conditions
Source: Royal Society of Chemistry journal article supplement (doi:10.1039/c8fo02528b), 2019-01-01

## Supplementary material

### Cellular barriers in apple tissue regulate polyphenol release under different food processing and *in vitro* digestion conditions

Dongjie Liu <sup>a,b</sup>, Patricia Lopez-Sanchez <sup>b,c</sup>, Michael J Gidley <sup>b\*</sup>

a Key Laboratory of Plant Cell Walls & Plant Resistance, Molecular Analysis & Genetic Improvement Center, South China Botanical Garden, Chinese Academy of Sciences, Guangzhou, 510650, China

b ARC Centre of Excellence in Plant Cell Walls, Centre for Nutrition and Food Sciences, Queensland Alliance for Agriculture and Food Innovation, The University of Queensland, St. Lucia, Brisbane, QLD 4072, Australia

c RISE\_Research Institutes of Sweden. Agrifood and Bioscience, SE-412 76, Gothenburg, Sweden

\* Corresponding author

Phone: +61 7 3365 2145

E-mail: [m.gidley@uq.edu.au](mailto:m.gidley@uq.edu.au) (M.J.Gidley)

Table S1: Excitation and emission wavelengths of different stains

|                              | Excitation wavelength used | Emission wavelength used |
|------------------------------|----------------------------|--------------------------|
| Calcofluor White M2R (CalFW) | 405 nm                     | 430 nm                   |
| Direct Red 23 (P4B)          | 555 nm                     | 615 nm                   |
| Fluorescein diacetate (FDA)  | 488 nm                     | 518 nm                   |
| Neutral Red (NR)             | 488 nm                     | 590 nm                   |
| Naturstoff reagent A (NA)    | 488 nm                     | 560 nm                   |

Figure S1: Confocal images illustrating fresh apple sections incubated with FDA stain for 5 min (a), 10 min (b) and 20 min (c). The images show different levels of FDA uptake represented by the intensity of the green colour. After 20 min incubation, clear and intact outlines of apple cells could be observed. Black areas represent damaged cells with no FDA fluorescence at the edge of the sample (d).

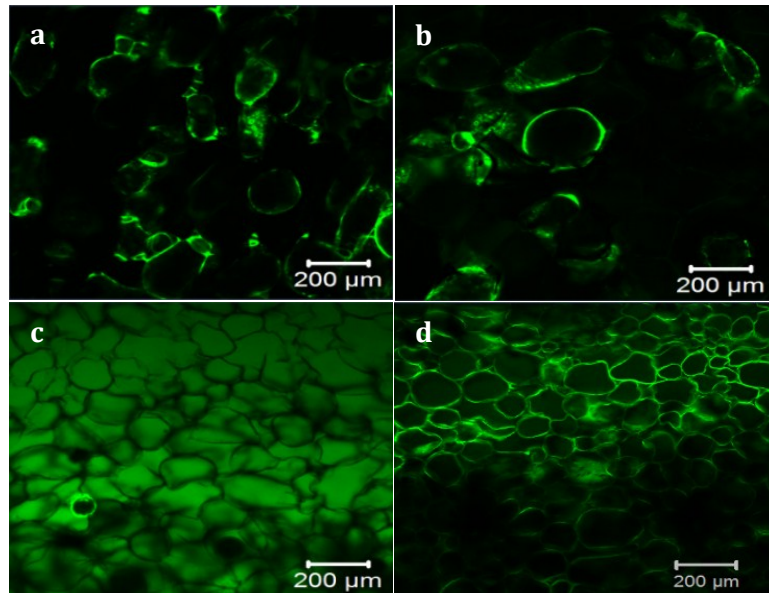

Figure S2: An identical apple tissue section observed without NA stain (a) and with NA stain (b) by confocal laser scanning microscopy. The fluorescence signal is significantly enhanced by NA (c), error bars represent standard deviation, n=5

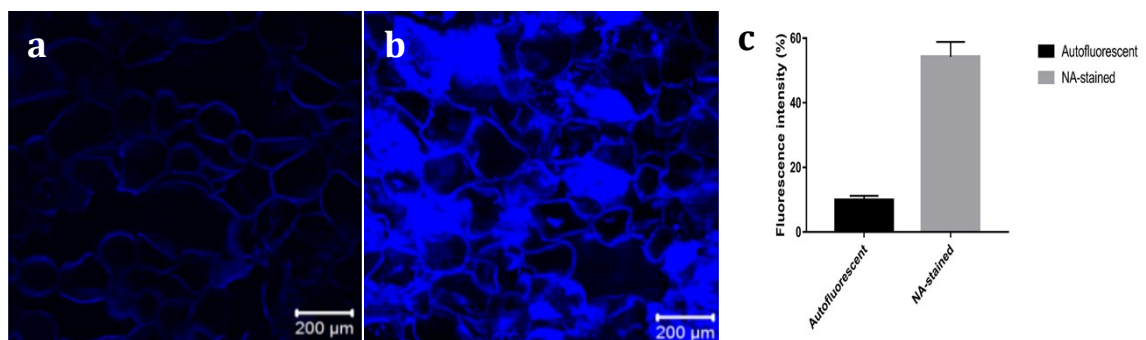

Figure S3: Samples with different thickness, 1 cm (A), 0.8 cm (B) and 0.5 cm (C) after treatment at pH 2 for 30 min. The sections were obtained from the middle of treated apple cubes and are stained with Neutral Red. The living and intact cells are stained in red. The core of the thinnest sample (C) shows a disruption of the vacuoles.

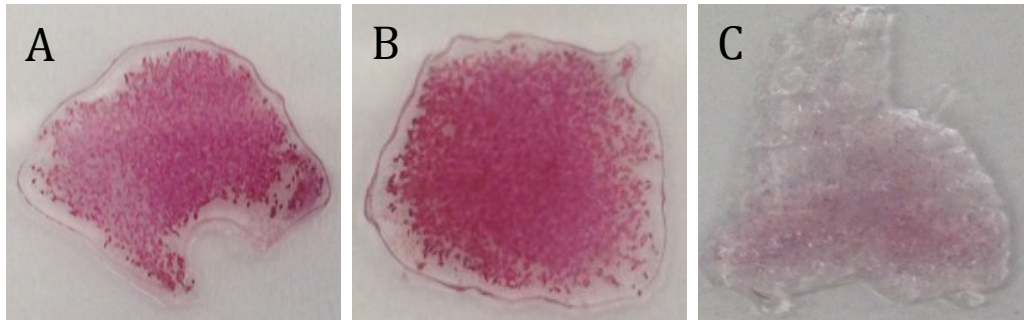

Supplement: c8fo02528b1.pdf [file c8fo02528b1.pdf]
